# Supplementary material
Source: Royal Society of Chemistry journal article supplement (doi:10.1039/d5gc06796k)
Supplement: d5gc06796k1.pdf [file d5gc06796k1.pdf]

### Supporting information

#### **Closing the loop for minimizing generation of liquid waste: Recycling phosphorus species from solid residual in activation with H<sub>3</sub>PO<sub>4</sub> for next-round activating biomass**

Mengjiao Fan<sup>a</sup>, Maowen Qi<sup>a</sup>, Yuxu Liu<sup>a</sup>, Xiantao Meng<sup>a</sup>, Yuchen Jiang<sup>a</sup>, Baihong Li<sup>a</sup>, Wenjian Liu<sup>a</sup>,  
Shu Zhang<sup>b</sup>, Yi Wang<sup>c,\*</sup>, Xun Hu<sup>a,\*</sup>

<sup>a</sup>School of Material Science and Engineering, University of Jinan, Jinan, 250022, P. R. China.

<sup>b</sup>College of Materials Science and Engineering, Nanjing Forestry University, Nanjing 210037, P. R. China.

<sup>c</sup>State Key Laboratory of Coal Combustion, Huazhong university of Science and Technology, Hubei 430074, P. R. China.

**Table S1** The relative abundance of light organics in the bio-oil produced from the pyrolysis of poplar wood at different temperatures

| Compound        | Relative abundance (%)                     |          |       |       |
|-----------------|--------------------------------------------|----------|-------|-------|
|                 | 300°C                                      | 500°C    | 700°C |       |
| <b>Acids</b>    | Acetic acid                                | 95.9     | 237.8 | 194.9 |
| <b>Ketones</b>  | 1-hydroxy-2-Propanone                      | 28.9     | 93.2  | 73.4  |
|                 | 1-(acetyloxy)-2-Butanone                   | 14.3     | 0     | 0     |
|                 | 1-(acetyloxy)-2-Propanone                  | 9.6      | 22.3  | 19.5  |
|                 | 1,2-Cyclopentanedione                      | 10.3     | 0     | 31.6  |
|                 | 2-Cyclopenten-1-one, 2-hydroxy-3-methyl-   | 15.5     | 42.43 | 35.6  |
|                 | 2-Cyclopenten-1-one, 3-ethyl-2-hydroxy-    | 7.3      | 12.7  | 0     |
|                 | Levogluosenone                             | 11.5     | 35.5  | 35.7  |
|                 | 1-(4-hydroxy-3-methoxyphenyl)-2-Propanone  | 8.7      | 9.5   | 14.5  |
|                 | 3',5'-Dimethoxyacetophenone                | 0        | 0     | 16.7  |
|                 | 4-Hydroxy-2-methylacetophenone             | 0        | 14.3  | 15.9  |
|                 | 1-(4-hydroxy-3,5-dimethoxyphenyl)-Ethanone | 5.1      | 0     | 9.1   |
|                 | 4-Heptanone                                | 0        | 0     | 29.1  |
|                 | Apocynin                                   | 0        | 0     | 5.0   |
|                 | <b>Aldehydes</b>                           | Furfural | 0     | 61.7  |
|                 | 2-ethyl-Butanal                            | 0        | 0     | 20.4  |
| <b>Alcohols</b> | 2-Furanmethanol, tetrahydro-               | 22.9     | 26.3  | 0     |
|                 | Cyclopropyl carbinol                       | 58.1     | 80.5  | 97.5  |
|                 | Butanol                                    | 0        | 0     | 131.2 |
| <b>Esters</b>   | Butyrolactone                              | 8.6      | 28.8  | 23.8  |
|                 | Hexanoic acid, 2-propenyl ester            | 13.3     | 0     | 0     |
|                 | Propanoic acid, 2-oxo-, ethyl ester        | 0        | 0     | 29.1  |
| <b>Ethers</b>   | 2,5-diethoxytetrahydro-Furan               | 23.2     | 7.4   | 0     |
|                 | 1,2,3-trimethoxy-5-methyl-Benzene          | 23.1     | 40.3  | 45.6  |
| <b>Phenols</b>  | Phenol                                     | 82.3     | 0     | 0     |
|                 | 2-methyl-Phenol                            | 0        | 9.7   | 12.5  |
|                 | p-Cresol                                   | 0        | 15.0  | 17.8  |
|                 | 2-methoxy-Phenol                           | 22.1     | 56.0  | 51.5  |
|                 | Creosol                                    | 7.8      | 42.3  | 39.7  |
|                 | 4-ethyl-2-methoxy-Phenol                   | 8.3      | 24.4  | 26.6  |
|                 | 2-Methoxy-4-vinylphenol                    | 2.7      | 0     | 0     |
|                 | 2,6-dimethoxy-Phenol                       | 54.6     | 111.6 | 123.9 |
|                 | 2-methoxy-3-(2-propenyl)-Phenol            | 2.4      | 0     | 0     |
|                 | 3,5-Dimethoxy-4-hydroxytoluene             | 20.9     | 54.8  | 60.6  |
|                 | 3-methoxy-1,2-Benzenediol                  | 0        | 24.6  | 27.1  |
|                 | 2,6-dimethoxy-4-(2-propenyl)-Phenol        | 0        | 7.0   | 9.8   |
|                 | 2-methoxy-5-(1-propenyl)-,                 | 0        | 6.9   | 5.5   |

|                                                |      |      |      |
|------------------------------------------------|------|------|------|
| (E)-Phenol                                     |      |      |      |
| 2-methoxy-4-(1-propenyl)-<br>(Z)-Phenol        | 9.0  | 19.2 | 21.4 |
| (E)-2,6-Dimethoxy-4-(prop-1-<br>en-1-yl)phenol | 28.0 | 30.2 | 28.4 |

**Table S2** The relative abundance of light organics in the bio-oil produced from the activation of poplar wood with fresh H<sub>3</sub>PO<sub>4</sub> and recycled P-containing species

| Compound        |                                                | Relative abundance (%)                    |       |       |                    |       |       |
|-----------------|------------------------------------------------|-------------------------------------------|-------|-------|--------------------|-------|-------|
|                 |                                                | H <sub>3</sub> PO <sub>4</sub> activation |       |       | Recycled P species |       |       |
|                 |                                                | 300°C                                     | 500°C | 700°C | 300°C              | 500°C | 700°C |
| <b>Acids</b>    | Acetic acid                                    | 31.6                                      | 57.0  | 40.4  | 14.8               | 27.0  | 19.7  |
| <b>Alcohols</b> | 1-Butanol                                      | 11.3                                      | 0     | 0     | 2.3                | 0     | 0     |
| <b>Esters</b>   | Ethyl levulinate                               | 54.2                                      | 91.4  | 37.2  | 14.8               | 20.3  | 14.4  |
|                 | Butanedioic acid, dimethyl ester               | 0                                         | 6.5   | 0     | 0                  | 2.8   | 0     |
|                 | 2(3H)-Furanone, 5-(acetyloxy)dihydro-5-methyl- | 0                                         | 0     | 7.5   | 0                  | 0     | 0     |
|                 | Diethyl phosphite                              | 0                                         | 0     | 34.5  | 0                  | 0     | 0     |

**Table S3** Average structural parameters of ACs from the X-ray diffraction profiles

| Samples            | Average structural parameters |                 |                  |              |        |
|--------------------|-------------------------------|-----------------|------------------|--------------|--------|
|                    | $2\theta^a$ (°)               | $B_{002}^b$ (°) | $d_{002}^c$ (nm) | $L_c^d$ (nm) | $N^e$  |
| <b>Biochar-500</b> | 23.43                         | 7.30            | 0.3794           | 1.0993       | 3.8979 |
| <b>Biochar-700</b> | 23.35                         | 7.03            | 0.3806           | 1.1417       | 3.9998 |
| <b>AC-I-300</b>    | 23.03                         | 8.03            | 0.3858           | 0.9984       | 3.5877 |
| <b>AC-I-500</b>    | 24.59                         | 5.47            | 0.3618           | 1.4703       | 5.0641 |
| <b>AC-I-700</b>    | 23.63                         | 7.56            | 0.3762           | 1.0619       | 3.8224 |
| <b>AC-II-300</b>   | 22.97                         | 8.62            | 0.3869           | 0.9300       | 3.4040 |
| <b>AC-II-500</b>   | 24.50                         | 6.45            | 0.3631           | 1.2459       | 4.4317 |
| <b>AC-II-700</b>   | 23.36                         | 7.85            | 0.3806           | 1.0220       | 3.6855 |

<sup>a</sup> $2\theta$ : diffraction angle;

<sup>b</sup> $B_{002}$ : half height width of the (002) peak;

<sup>c</sup> $d_{002}$ : interlayer spacing of biochar;

<sup>d</sup> $L_c$ : crystalline height of biochar;

<sup>e</sup> $N$  = crystalline stacks of AC.

**Table S4** Environmental impacts, energy consumption, and resource depletion for production of the ACs from activation of poplar with fresh H<sub>3</sub>PO<sub>4</sub> and recycled P-containing species

| Factors                                             | Fresh H <sub>3</sub> PO <sub>4</sub> |          |          | Recycled P species |          |          |
|-----------------------------------------------------|--------------------------------------|----------|----------|--------------------|----------|----------|
|                                                     | 300°C                                | 500°C    | 700°C    | 300°C              | 500°C    | 700°C    |
| <b>Acidification (kg SO<sub>2</sub> eq)</b>         | 7.56E+04                             | 1.18E+05 | 1.60E+05 | 5.83E+04           | 9.16E+04 | 1.07E+05 |
| <b>Carcinogenics (CTUh)</b>                         | 5.04E+01                             | 7.84E+01 | 1.06E+02 | 3.89E+01           | 6.11E+01 | 7.14E+01 |
| <b>Ecotoxicity (CTUe)</b>                           | 7.38E+08                             | 1.15E+09 | 1.56E+09 | 5.69E+08           | 8.93E+08 | 1.04E+09 |
| <b>Eutrophication (kg N eq)</b>                     | 5.95E+04                             | 9.13E+04 | 1.23E+05 | 4.53E+04           | 7.06E+04 | 8.22E+04 |
| <b>Fossil fuel depletion (MJ surplus)</b>           | 1.32E+07                             | 2.06E+07 | 2.79E+07 | 1.02E+07           | 1.60E+07 | 1.87E+07 |
| <b>Global warming (kg CO<sub>2</sub> eq)</b>        | 1.82E+07                             | 2.83E+07 | 3.84E+07 | 1.40E+07           | 2.20E+07 | 2.57E+07 |
| <b>Non carcinogenics (CTUh)</b>                     | 1.82E+01                             | 2.84E+01 | 3.85E+01 | 1.41E+01           | 2.21E+01 | 2.58E+01 |
| <b>Ozone depletion (kg CFC-11 eq)</b>               | 1.10E+00                             | 1.71E+00 | 2.32E+00 | 8.50E-01           | 1.33E+00 | 1.56E+00 |
| <b>Respiratory effects (kg PM<sub>2.5</sub> eq)</b> | 2.63E+04                             | 4.09E+04 | 5.55E+04 | 2.03E+04           | 3.19E+04 | 3.72E+04 |
| <b>Smog (kg O<sub>3</sub> eq)</b>                   | 1.07E+06                             | 1.66E+06 | 2.26E+06 | 8.26E+05           | 1.30E+06 | 1.51E+06 |

**Table S5** Input and output of production of AC using fresh H<sub>3</sub>PO<sub>4</sub> as the activator, based on 2 tons of poplar

| Input/Output                   | Fresh H <sub>3</sub> PO <sub>4</sub> |         |         | Unit |
|--------------------------------|--------------------------------------|---------|---------|------|
|                                | 300°C                                | 500°C   | 700°C   |      |
| Quantity                       |                                      |         |         |      |
| <b>Step 1: Transportation</b>  |                                      |         |         |      |
| <b>Input</b>                   |                                      |         |         |      |
| Feedstock                      | 2000.0                               | 2000.0  | 2000.0  | kg   |
| transportation                 | 2.0                                  | 2.0     | 2.0     | tkm  |
| <b>Output</b>                  |                                      |         |         |      |
| Feedstock after transportation | 1980.0                               | 1980.0  | 1980.0  | kg   |
| <b>Step 2: Pretreatment</b>    |                                      |         |         |      |
| <b>Input</b>                   |                                      |         |         |      |
| Feedstock after transportation | 1980.0                               | 1980.0  | 1980.0  | kg   |
| Water                          | 5940.0                               | 5940.0  | 5940.0  | kg   |
| Electricity                    | 2851.2                               | 2851.2  | 2851.2  | MJ   |
| <b>Output</b>                  |                                      |         |         |      |
| Feedstock after pretreatment   | 1960.2                               | 1960.2  | 1960.2  | kg   |
| Waste water                    | 5940.0                               | 5940.0  | 5940.0  | kg   |
| <b>Step 3: Impregnation</b>    |                                      |         |         |      |
| <b>Input</b>                   |                                      |         |         |      |
| Feedstock after pretreatment   | 1960.2                               | 1960.2  | 1960.2  | kg   |
| H <sub>3</sub> PO <sub>4</sub> | 3920.4                               | 3920.4  | 3920.4  | kg   |
| Water                          | 17641.8                              | 17641.8 | 17641.8 | kg   |
| Electricity                    | 2822.7                               | 2822.7  | 2822.7  | MJ   |
| <b>Output</b>                  |                                      |         |         |      |

|                                     |         |         |         |    |
|-------------------------------------|---------|---------|---------|----|
| <b>Feedstock after impregnation</b> | 5880.6  | 5880.6  | 5880.6  | kg |
| <b>Waste water</b>                  | 17641.8 | 17641.8 | 17641.8 | kg |

#### Step 4: Activation

| Input                               |        |        |        |                |
|-------------------------------------|--------|--------|--------|----------------|
| <b>Feedstock after impregnation</b> | 5880.6 | 5880.6 | 5880.6 | kg             |
| <b>Natural gas</b>                  | 1475.1 | 2294.6 | 3114.1 | m <sup>3</sup> |
| <b>Electricity</b>                  | 31.8   | 38.8   | 45.9   | MJ             |
| Output                              |        |        |        |                |
| <b>Mixture</b>                      | 4839.7 | 4287.0 | 2740.4 | kg             |
| <b>Bio-oil</b>                      | 623.3  | 1311.4 | 2458.1 | kg             |
| <b>H<sub>2</sub></b>                | 0      | 2.9    | 42.3   | kg             |
| <b>CO</b>                           | 88.2   | 58.8   | 241.1  | kg             |
| <b>CO<sub>2</sub></b>               | 329.3  | 217.6  | 376.4  | kg             |
| <b>CH<sub>4</sub></b>               | 0      | 5.3    | 17.1   | kg             |

#### Step 5: Post-treatment

| Input              |         |         |        |    |
|--------------------|---------|---------|--------|----|
| <b>Mixture</b>     | 4839.7  | 4287.0  | 2740.4 | kg |
| <b>Water</b>       | 14519.2 | 12860.9 | 8221.1 | kg |
| <b>Electricity</b> | 5207.9  | 4411.9  | 3996.9 | MJ |
| Output             |         |         |        |    |
| <b>AC</b>          | 3616.6  | 3063.8  | 2775.6 | kg |
| <b>Waste water</b> | 14519.2 | 12860.9 | 8221.1 | kg |

**Table S6** Input and output of production of AC using recycled P-containing species as the activator, based on 1 ton of poplar

| Input/Output                   | Recycled P species |        |        | Unit |
|--------------------------------|--------------------|--------|--------|------|
|                                | 300°C              | 500°C  | 700°C  |      |
|                                | Quantity           |        |        |      |
| <b>Step 1: Transportation</b>  |                    |        |        |      |
| <b>Input</b>                   |                    |        |        |      |
| Feedstock                      | 1000.0             | 1000.0 | 1000.0 | kg   |
| transportation                 | 1.0                | 1.0    | 1.0    | tkm  |
| <b>Output</b>                  |                    |        |        |      |
| Feedstock after transportation | 990.0              | 990.0  | 990.0  | kg   |
| <b>Step 2: Pretreatment</b>    |                    |        |        |      |
| <b>Input</b>                   |                    |        |        |      |
| Feedstock after transportation | 990.0              | 990.0  | 990.0  | kg   |
| Water                          | 2970.0             | 2970.0 | 2970.0 | kg   |
| Electricity                    | 1425.6             | 1425.6 | 1425.6 | MJ   |
| <b>Output</b>                  |                    |        |        |      |
| Feedstock after pretreatment   | 980.1              | 980.1  | 980.1  | kg   |
| Waste water                    | 2970.0             | 2970.0 | 2970.0 | kg   |
| <b>Step 3: Impregnation</b>    |                    |        |        |      |
| <b>Input</b>                   |                    |        |        |      |
| Feedstock after pretreatment   | 1960.2             | 1960.2 | 1960.2 | kg   |
| H <sub>3</sub> PO <sub>4</sub> | 1960.2             | 1960.2 | 1960.2 | kg   |
| Water                          | 8820.9             | 8820.9 | 8820.9 | kg   |
| Electricity                    | 1411.3             | 1411.3 | 1411.3 | MJ   |
| <b>Output</b>                  |                    |        |        |      |

|                                     |        |        |        |    |
|-------------------------------------|--------|--------|--------|----|
| <b>Feedstock after impregnation</b> | 2940.3 | 2940.3 | 2940.3 | kg |
| <b>Waste water</b>                  | 8820.9 | 8820.9 | 8820.9 | kg |

#### Step 4: Activation

| <b>Input</b>                        |        |        |        |                |
|-------------------------------------|--------|--------|--------|----------------|
| <b>Feedstock after impregnation</b> | 2940.3 | 2940.3 | 2940.3 | kg             |
| <b>Natural gas</b>                  | 737.5  | 1147.3 | 1557.0 | m <sup>3</sup> |
| <b>Electricity</b>                  | 15.9   | 19.4   | 22.9   | MJ             |
| <b>Output</b>                       |        |        |        |                |
| <b>Mixture</b>                      | 2419.9 | 2143.5 | 1370.2 | kg             |
| <b>Bio-oil</b>                      | 311.7  | 655.7  | 1229.0 | kg             |
| <b>H<sub>2</sub></b>                | 0      | 1.5    | 21.2   | kg             |
| <b>CO</b>                           | 44.1   | 29.4   | 120.6  | kg             |
| <b>CO<sub>2</sub></b>               | 164.7  | 108.8  | 188.2  | kg             |
| <b>CH<sub>4</sub></b>               | 0      | 2.6    | 8.5    | kg             |

#### Step 5: Post-treatment

| <b>Input</b>            |        |        |        |    |
|-------------------------|--------|--------|--------|----|
| <b>Mixture</b>          | 2419.9 | 2143.5 | 1370.2 | kg |
| <b>Water</b>            | 7259.6 | 6430.4 | 4110.5 | kg |
| <b>Electricity</b>      | 2603.9 | 2205.9 | 1998.5 | MJ |
| <b>Output</b>           |        |        |        |    |
| <b>AC</b>               | 1808.3 | 1531.9 | 1387.8 | kg |
| <b>Washing filtrate</b> | 7259.6 | 6430.4 | 4110.5 | kg |

#### Step 6: Transportation

| <b>Input</b>     |        |        |        |    |
|------------------|--------|--------|--------|----|
| <b>Feedstock</b> | 1000.0 | 1000.0 | 1000.0 | kg |

|                                       |       |       |       |     |
|---------------------------------------|-------|-------|-------|-----|
| <b>transportation</b>                 | 1.0   | 1.0   | 1.0   | tkm |
| <b>Output</b>                         |       |       |       |     |
| <b>Feedstock after transportation</b> | 990.0 | 990.0 | 990.0 | kg  |

#### Step 7: Pretreatment

|                                       |        |        |        |    |
|---------------------------------------|--------|--------|--------|----|
| <b>Input</b>                          |        |        |        |    |
| <b>Feedstock after transportation</b> | 990.0  | 990.0  | 990.0  | kg |
| <b>Water</b>                          | 2970.0 | 2970.0 | 2970.0 | kg |
| <b>Electricity</b>                    | 1425.6 | 1425.6 | 1425.6 | MJ |
| <b>Output</b>                         |        |        |        |    |
| <b>Feedstock after pretreatment</b>   | 980.1  | 980.1  | 980.1  | kg |
| <b>Waste water</b>                    | 2970.0 | 2970.0 | 2970.0 | kg |

#### Step 8: Impregnation

|                                     |        |        |        |    |
|-------------------------------------|--------|--------|--------|----|
| <b>Input</b>                        |        |        |        |    |
| <b>Feedstock after pretreatment</b> | 1960.2 | 1960.2 | 1960.2 | kg |
| <b>Washing filtrate</b>             | 7259.6 | 6430.4 | 4110.5 | kg |
| <b>Electricity</b>                  | 1411.3 | 1411.3 | 1411.3 | MJ |
| <b>Output</b>                       |        |        |        |    |
| <b>Feedstock after impregnation</b> | 1597.6 | 1641.7 | 1004.6 | kg |

#### Step 9: Activation

|                                     |        |        |        |                |
|-------------------------------------|--------|--------|--------|----------------|
| <b>Input</b>                        |        |        |        |                |
| <b>Feedstock after impregnation</b> | 1597.6 | 1641.7 | 1004.6 | kg             |
| <b>Natural gas</b>                  | 400.7  | 640.6  | 532.0  | m <sup>3</sup> |
| <b>Electricity</b>                  | 8.6    | 10.8   | 7.8    | MJ             |
| <b>Output</b>                       |        |        |        |                |
| <b>Mixture</b>                      | 1263.7 | 1170.5 | 381.7  | kg             |

|                                |        |        |        |    |
|--------------------------------|--------|--------|--------|----|
| <b>Bio-oil</b>                 | 156.6  | 170.7  | 500.3  | kg |
| <b>H<sub>2</sub></b>           | 0      | 6.2    | 6.6    | kg |
| <b>CO</b>                      | 52.7   | 64.0   | 55.3   | kg |
| <b>CO<sub>2</sub></b>          | 124.6  | 221.6  | 59.3   | kg |
| <b>CH<sub>4</sub></b>          | 0.3    | 2.3    | 1.4    | kg |
| <b>Step 10: Post-treatment</b> |        |        |        |    |
| <b>Input</b>                   |        |        |        |    |
| <b>Mixture</b>                 | 1263.7 | 1170.5 | 381.7  | kg |
| <b>Water</b>                   | 3791.0 | 3511.5 | 1145.2 | kg |
| <b>Electricity</b>             | 1035.2 | 924.3  | 441.2  | MJ |
| <b>Output</b>                  |        |        |        |    |
| <b>AC</b>                      | 718.9  | 641.9  | 306.4  | kg |
| <b>Wastewater</b>              | 3791.0 | 3511.5 | 1145.2 | kg |

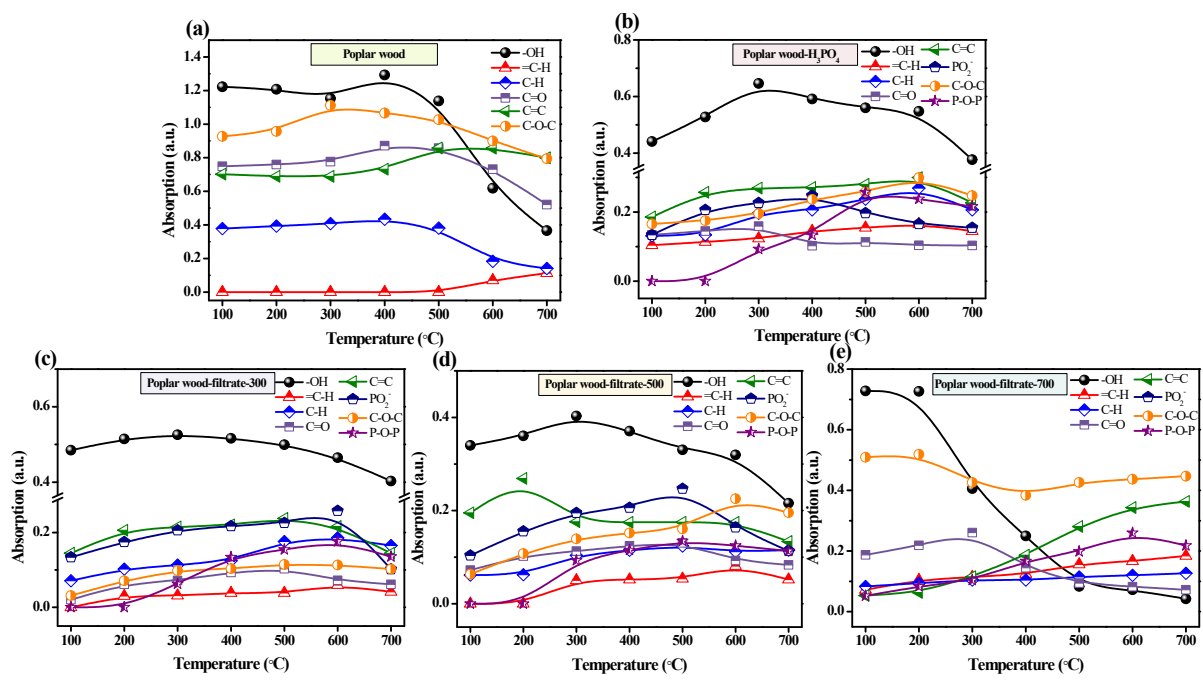

**Figure S1** Evolution of functionalities in *in-situ* DRIFTS spectra of the pyrolysis and activation of poplar with various activators. (a) poplar pyrolysis; (b) poplar activation with fresh H<sub>3</sub>PO<sub>4</sub>; (c) poplar activation with filtrate-300; (d) poplar activation with filtrate-500; (e) poplar activation with filtrate-700.
